# Supplementary material for: Classification of Cowpox Viruses into Several Distinct Clades and Identification of a Novel Lineage
Source: MDPI journal article supplement (doi:10.3390/v9060142), 2017-06-10
Supplement: s1 [file s1]

## Supplementary Information for

Franke *et al.*: Classification of cowpox viruses into several distinct clades and identification of a novel lineage.

### TABLES

**Table S1:** 63 full-length OPV sequences, included in the phylogenetic analysis

| Species               | Strain name          | Collection year | Country    | Host       | Accession |
|-----------------------|----------------------|-----------------|------------|------------|-----------|
| <i>Camelpox virus</i> | 0408151v             | n.a.            | n.a.       | n.a.       | KP768318  |
|                       | CMS                  | 1970            | Iran       | Dromedary  | AY009089  |
|                       | M-96 from Kazakhstan | 1996            | Kazakhstan | Dromedary  | AF438165  |
| <i>Cowpox virus</i>   | Amadeus 2015         | 2015            | Germany    | Horse      | LN879483  |
|                       | Austria 1999         | 1999            | Austria    | Cat        | HQ407377  |
|                       | BeaBer04/1           | 2004            | Germany    | Beaver     | KC813491  |
|                       | Brighton Red         | 1939            | UK         | Human      | AF482758  |
|                       | CatBer07/1           | 2007            | Germany    | Cat        | KC813502  |
|                       | CatPot07/1           | 2007            | Germany    | Cat        | KC813506  |
|                       | EleGri07/1           | 2007            | Germany    | Elephant   | KC813507  |
|                       | Finland_2000_MAN     | 2000            | Finland    | Human      | HQ420893  |
|                       | FM2292               | 2011            | Germany    | Vole       | LN864566  |
|                       | France_2001_Nancy    | 2001            | France     | Human      | HQ420894  |
|                       | Germany 91-3         | 1991            | Germany    | Human      | DQ437593  |
|                       | Germany_1980_EP4     | 1980            | Germany    | Elephant   | HQ420895  |
|                       | Germany_1990_2       | 1990            | Germany    | Human      | HQ420896  |
|                       | Germany_1998_2       | 1998            | Germany    | Human      | HQ420897  |
|                       | Germany_2002_MKY     | 2002            | Germany    | Marmoset   | HQ420898  |
|                       | GRI-90               | 1990            | Russia     | Human      | X94355    |
|                       | HumAac09/1           | 2009            | Germany    | Human      | KC813508  |
|                       | HumBer07/1           | 2007            | Germany    | Human      | KC813509  |
|                       | HumGra07/1           | 2007            | Germany    | Human      | KC813510  |
|                       | HumGri07/1           | 2007            | Germany    | Human      | KC813511  |
|                       | HumKre08/1           | 2008            | Germany    | Human      | KC813512  |
|                       | HumLan08/1           | 2008            | Germany    | Human      | KC813492  |
|                       | HumLit08/1           | 2008            | Germany    | Human      | KC813493  |
|                       | HumLue09/1           | 2009            | Germany    | Human      | KC813494  |
|                       | HumMag07/1           | 2007            | Germany    | Human      | KC813495  |
|                       | HumPad07/1           | 2007            | Germany    | Human      | KC813496  |
|                       | JagKre08/1           | 2008            | Germany    | Jaguarundi | KC813497  |
|                       | JagKre08/2           | 2008            | Germany    | Jaguarundi | KC813498  |
|                       | Kostroma_2015        | 2015            | Russia     | Human      | KY369926  |
|                       | MarLei07/1           | 2007            | Germany    | Mara       | KC813499  |

|                         |                              |      |                |          |           |
|-------------------------|------------------------------|------|----------------|----------|-----------|
|                         | MonKre08/4                   | 2008 | Germany        | Mongoose | KC813500  |
|                         | Norway_1994_MAN              | 1994 | Norway         | Human    | HQ420899  |
|                         | RatAac09/1                   | 2009 | Germany        | Rat      | KC813501  |
|                         | RatGer09/1                   | 2009 | Germany        | Rat      | KC813503  |
|                         | RatHei09/1                   | 2009 | Germany        | Rat      | KC813504  |
|                         | RatKre08/2                   | 2008 | Germany        | Rat      | KC813505  |
|                         | RatPox09                     | 2009 | Germany        | Rat      | LN864565  |
|                         | UK2000_K2984                 | 2000 | United Kingdom | Cat      | HQ420900  |
| <i>Ectromelia virus</i> | Moscow                       | 1947 | Russia         | Mouse    | AF012825  |
|                         | Naval                        | 1996 | USA            | Mouse    | KJ563295  |
|                         | VR-1431                      | 1987 | China          | Human    | JQ410350  |
| <i>Monkeypox virus</i>  | Cote d'Ivoire_1971           | 1971 | Cote d'Ivoire  | Human    | KP849470  |
|                         | Ivory Coast 2012             | 2012 | Cote d'Ivoire  | Monkey   | KJ136820  |
|                         | Liberia_1970_184             | 1970 | Liberia        | Human    | DQ011156  |
|                         | Sudan 2005_01                | 2005 | Sudan: Nuria   | Human    | KC257459  |
| <i>Raccoonpox virus</i> | Raccoonpox virus 85A         | 1964 | USA            | Raccoon  | KU749309  |
|                         | Raccoonpox virus Herman      | 1964 | USA            | Raccoon  | KP143769  |
| <i>Skunkpox virus</i>   | Skunkpox virus               | 1978 | USA            | Skunk    | KU749310  |
| <i>Taterapox virus</i>  | Taterapox virus Dahomey 1968 | 1968 | Benin          | Gerbil   | DQ437594  |
| <i>Vaccinia virus</i>   | Copenhagen                   | n.a. | n.a.           | n.a.     | M35027    |
|                         | DUKE                         | 1970 | USA            | Human    | DQ439815  |
|                         | Horsepox virus               | 1976 | Mongolia       | Horse    | DQ792504  |
|                         | Rabbitpox virus              | 1941 | Netherland     | Rabbit   | AY484669  |
|                         | WR                           | n.a. | n.a.           | n.a.     | NC_006998 |
| <i>Variola virus</i>    | Congo 1970                   | 1970 | Congo          | Human    | DQ437583  |
|                         | Germany 1958 Heidelberg      | 1958 | Germany        | Human    | DQ437584  |
|                         | Guinea 1969 (005)            | 1969 | Guinea         | Human    | DQ441426  |
|                         | United Kingdom 1952 Butler   | 1952 | United Kingdom | Human    | DQ441447  |
|                         | VD21, 17th century           | 1654 | Lithuania      | Human    | KY358055  |
| <i>Volepox virus</i>    | Volepox virus CA             | 1985 | USA            | Vole     | KU749311  |

n.a.: not available

**Table S2:** Sampling coordinates of 58 CPXV strains

| Strain name       | Clade       | Town           | lat       | lon       |
|-------------------|-------------|----------------|-----------|-----------|
| Amadeus           | CPXV-like 1 | Berlin         | 52.520007 | 13.404954 |
| Austria           | VACV-like   | Texing         | 48.041870 | 15.329212 |
| BeaBer04/1        | CPXV-like 1 | Berlin         | 52.520007 | 13.404954 |
| Brighton Red      | CPXV-like 2 | Brighton       | 50.822530 | -0.137163 |
| CatBer07/1        | CPXV-like 1 | Berlin         | 52.520007 | 13.404954 |
| CatPot07/1        | CPXV-like 1 | Potsdam        | 52.390569 | 13.064473 |
| EleGri07/1        | CPXV-like 1 | Grimmen        | 54.108146 | 13.037749 |
| Finland_2000_MAN  | VACV-like   | Tohmajärvi     | 62.225171 | 30.335391 |
| FM2292            | CPXV-like 2 | Rutesheim      | 48.808150 | 8.945504  |
| France_2001_Nancy | CPXV-like 2 | Nancy          | 48.692054 | 6.184417  |
| Ger/2007/Vole     | CPXV-like 2 | Rottweil       | 48.165258 | 8.628453  |
| Ger/2010/Alpaca   | CPXV-like 1 | Oberwiesenthal | 50.418622 | 12.969410 |

|                      |               |                 |           |           |
|----------------------|---------------|-----------------|-----------|-----------|
| Ger/2010/Cat         | CPXV-like 1   | Nordhausen      | 51.499079 | 10.791581 |
| Ger/2010/Racoon      | CPXV-like 1   | Ellrich         | 51.586546 | 10.662888 |
| Ger/2010/Rat         | CPXV-like 1   | Hannover        | 52.375892 | 9.732010  |
| Ger 2010 MKY         | (CPXV-like 3) | Bad Liebenstein | 50.815306 | 10.349743 |
| Ger/2012/Alpaca      | CPXV-like 1   | Rositz          | 51.021516 | 12.373653 |
| Ger/2013/Alpaca      | CPXV-like 1   | Zernitz         | 52.015532 | 12.084589 |
| Ger/2014/Cat1        | CPXV-like 1   | Bleckede        | 53.286547 | 10.733486 |
| Ger/2014/Cat2        | CPXV-like 1   | Nordhausen      | 51.499079 | 10.791581 |
| Ger/2014/Human       | CPXV-like 2   | Freiburg        | 47.999008 | 7.842104  |
| Ger/2015/Cat1        | CPXV-like 2   | Vogtlandkreis   | 50.489135 | 12.280376 |
| Ger/2015/Cat2        | CPXV-like 1   | Rostock         | 54.092441 | 12.099147 |
| Ger/2015/Cat3        | CPXV-like 1   | Vogtlandkreis   | 50.489135 | 12.280376 |
| Ger/2015/Cat4        | CPXV-like 1   | Hengelbach      | 50.724078 | 11.110978 |
| Ger/2015/Human1      | CPXV-like 1   | Leipzig         | 51.339695 | 12.373075 |
| Ger/2015/Human2      | CPXV-like 1   | Leipzig         | 51.339695 | 12.373075 |
| Ger/2015/Prairie Dog | CPXV-like 1   | Dresden         | 51.050409 | 13.737262 |
| Germany 91-3         | CPXV-like 2   | Munich          | 48.135125 | 11.581981 |
| Germany 1980_EP4     | CPXV-like 1   | Hameln          | 52.108273 | 9.362171  |
| Germany 1990_2       | CPXV-like 2   | Bonn            | 50.737430 | 7.098207  |
| Germany 1998_2       | n.a.          | Eckental        | 49.574179 | 11.201352 |
| Germany_2002_MKY     | CPXV-like 1   | Göttingen       | 51.541280 | 9.915804  |
| GRI-90               | VACV-like     | Moscow          | 55.755826 | 37.617300 |
| HumAac09/1           | VARV-like     | Aachen          | 50.775346 | 6.083887  |
| HumBer07/1           | CPXV-like 1   | Berlin          | 52.520007 | 13.404954 |
| HumGra07/1           | VARV-like     | Graz            | 47.070714 | 15.439504 |
| HumGri07/1           | CPXV-like 1   | Grimmen         | 54.108146 | 13.037749 |
| HumKre08/1           | VARV-like     | Krefeld         | 51.338761 | 6.585342  |
| HumLan08/1           | CPXV-like 1   | Landau          | 49.198886 | 8.118562  |
| HumLit08/1           | n.a.          | Vilnius         | 54.687156 | 25.279651 |
| HumLue09/1           | CPXV-like 2   | Lübeck          | 53.865467 | 10.686559 |
| HumMag07/1           | CPXV-like 1   | Magdeburg       | 52.120533 | 11.627624 |
| HumPad07/1           | CPXV-like 1   | Paderborn       | 51.718921 | 8.757509  |
| JagKre08/1           | CPXV-like 1   | Krefeld         | 51.338761 | 6.585342  |
| JagKre08/2           | CPXV-like 1   | Krefeld         | 51.338761 | 6.585342  |
| MarLei07/1           | CPXV-like 2   | Leipzig         | 51.339695 | 12.373075 |
| MonKre08/4           | CPXV-like 1   | Krefeld         | 51.338761 | 6.585342  |
| Norway_1994_MAN      | CPXV-like 2   | Bergen          | 60.391263 | 5.322054  |
| RatAac09/1           | VARV-like     | Aachen          | 50.775346 | 6.083887  |
| RatGer09/1           | VARV-like     | Germering       | 48.135181 | 11.369089 |
| RatHei09/1           | CPXV-like 1   | Heidelberg      | 49.398752 | 8.672434  |
| RatKre08/2           | VARV-like     | Krefeld         | 51.338761 | 6.585342  |
| Ratpox09             | VARV-like     | Munich          | 48.135125 | 11.581981 |
| UK2000_K2984         | CPXV-like 2   | Bristol         | 51.454513 | -2.587910 |
| Kostroma_2015        | VACV-like     | Kostroma        | 57.777482 | 40.969893 |
| Ger/2017/Alpaca1     | CPXV-like 1   | Brand-Erbisdorf | 50.866688 | 13.323660 |
| Ger/2017/Alpaca2     | CPXV-like 1   | Merzdorf        | 51.403338 | 13.538144 |

n.a.: not applicable

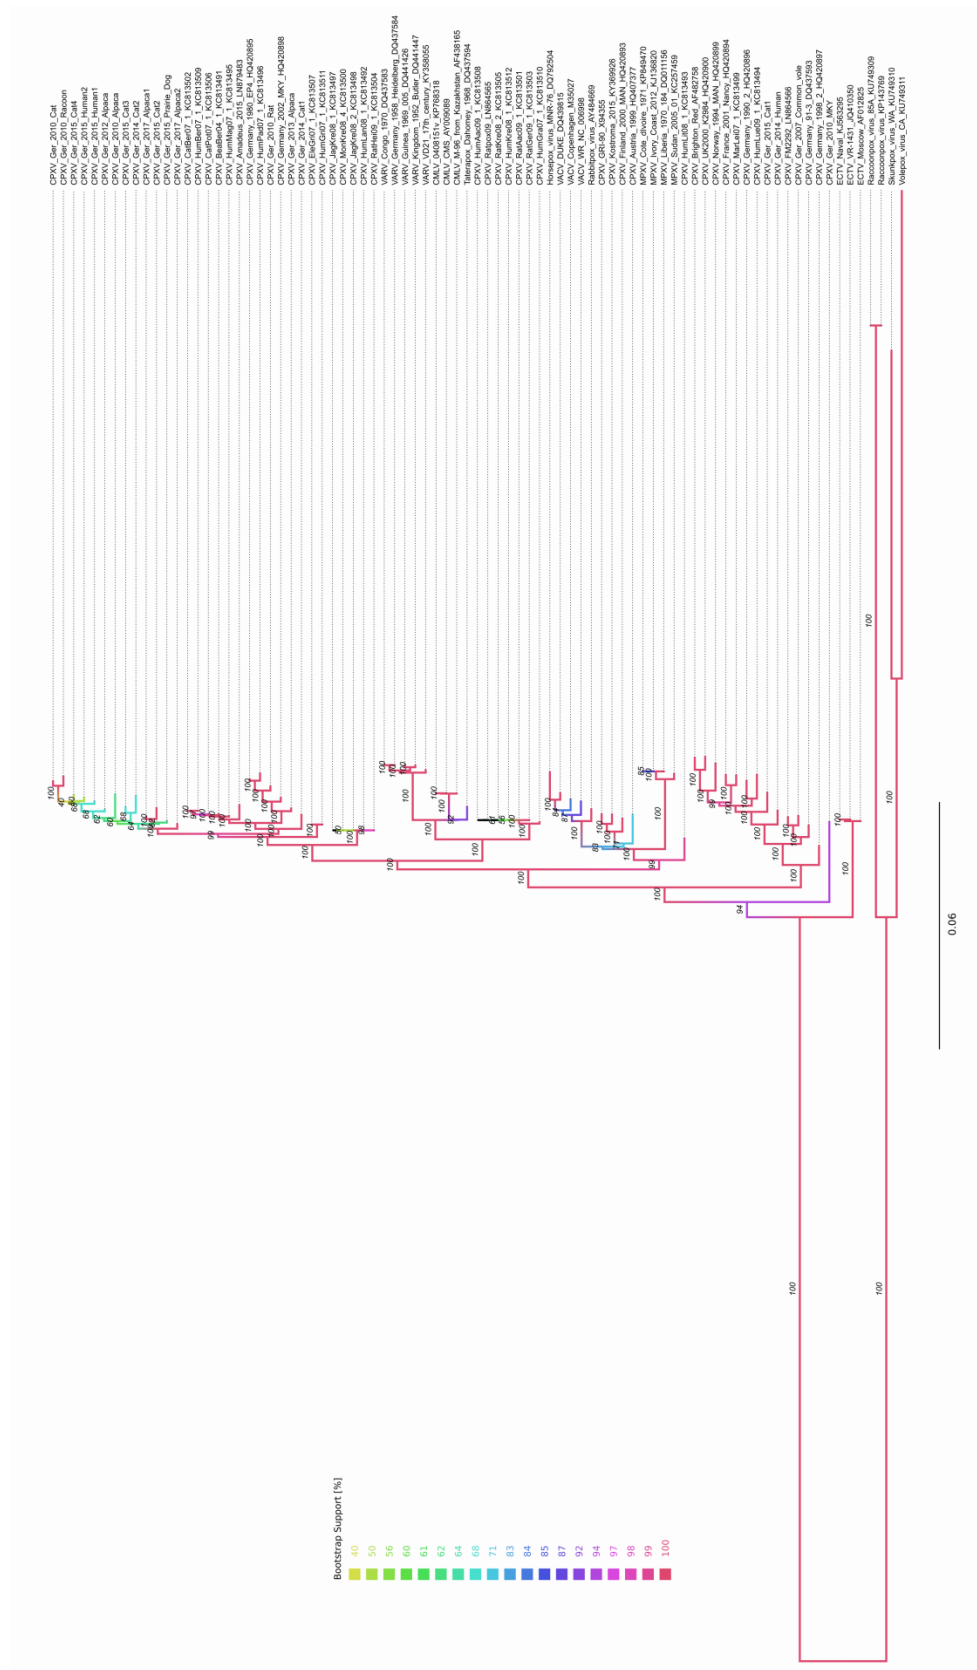

**Figure S1:** Phylogeny of Orthopoxviruses, rooted at New-World species. Scale represent substitutions per position. Statistic support by 100.000 ultrafast bootstraps is indicated for each branch by colour indication in addition to individual % value.
